# Supplementary material
Source: PubMed Central journal article supplement (PMC10061319)
Supplement: jamasurg-e230146-s001.pdf [file jamasurg-e230146-s001.pdf]

## Supplementary Online Content

Custers PA, van der Sande ME, Grotenhuis BA, et al; Dutch Watch-and-Wait Consortium. Long-term quality of life and functional outcome of patients with rectal cancer following a watch-and-wait approach. *JAMA Surg*. Published online March 29, 2023. doi:10.1001/jamasurg.2023.0146

**eFigure.** Treatment Details of 278 Patients Included for the Current Analysis

**eTable 1.** Quality of Life and Functional Outcome of Patients Followed by Watch and Wait Without Requiring Additional Surgery at 3, 12, and 24 Months Following Inclusion

**eTable 2.** Quality of Life and Functional Outcome of Patients Treated With Local Excision (LE) and Patients Treated With Total Mesorectal Excision (TME) Compared to Patients Followed by Watch-and-Wait Without Requiring Additional Surgery (W&W) at 24 Months Following Inclusion

**eTable 3.** Association of Sex, Age, Tumor Distance, and Neoadjuvant Treatment on Quality of Life and Functional Outcome at 24 Months Following Inclusion

**eTable 4.** Quality of Life and Functional Outcome of All Patients Included in the Dutch Watch-and-Wait Registry at 3, 12, and 24 Months Following Inclusion

This supplementary material has been provided by the authors to give readers additional information about their work.

**eFigure.** Treatment Details of 278 Patients Included for the Current Analysis

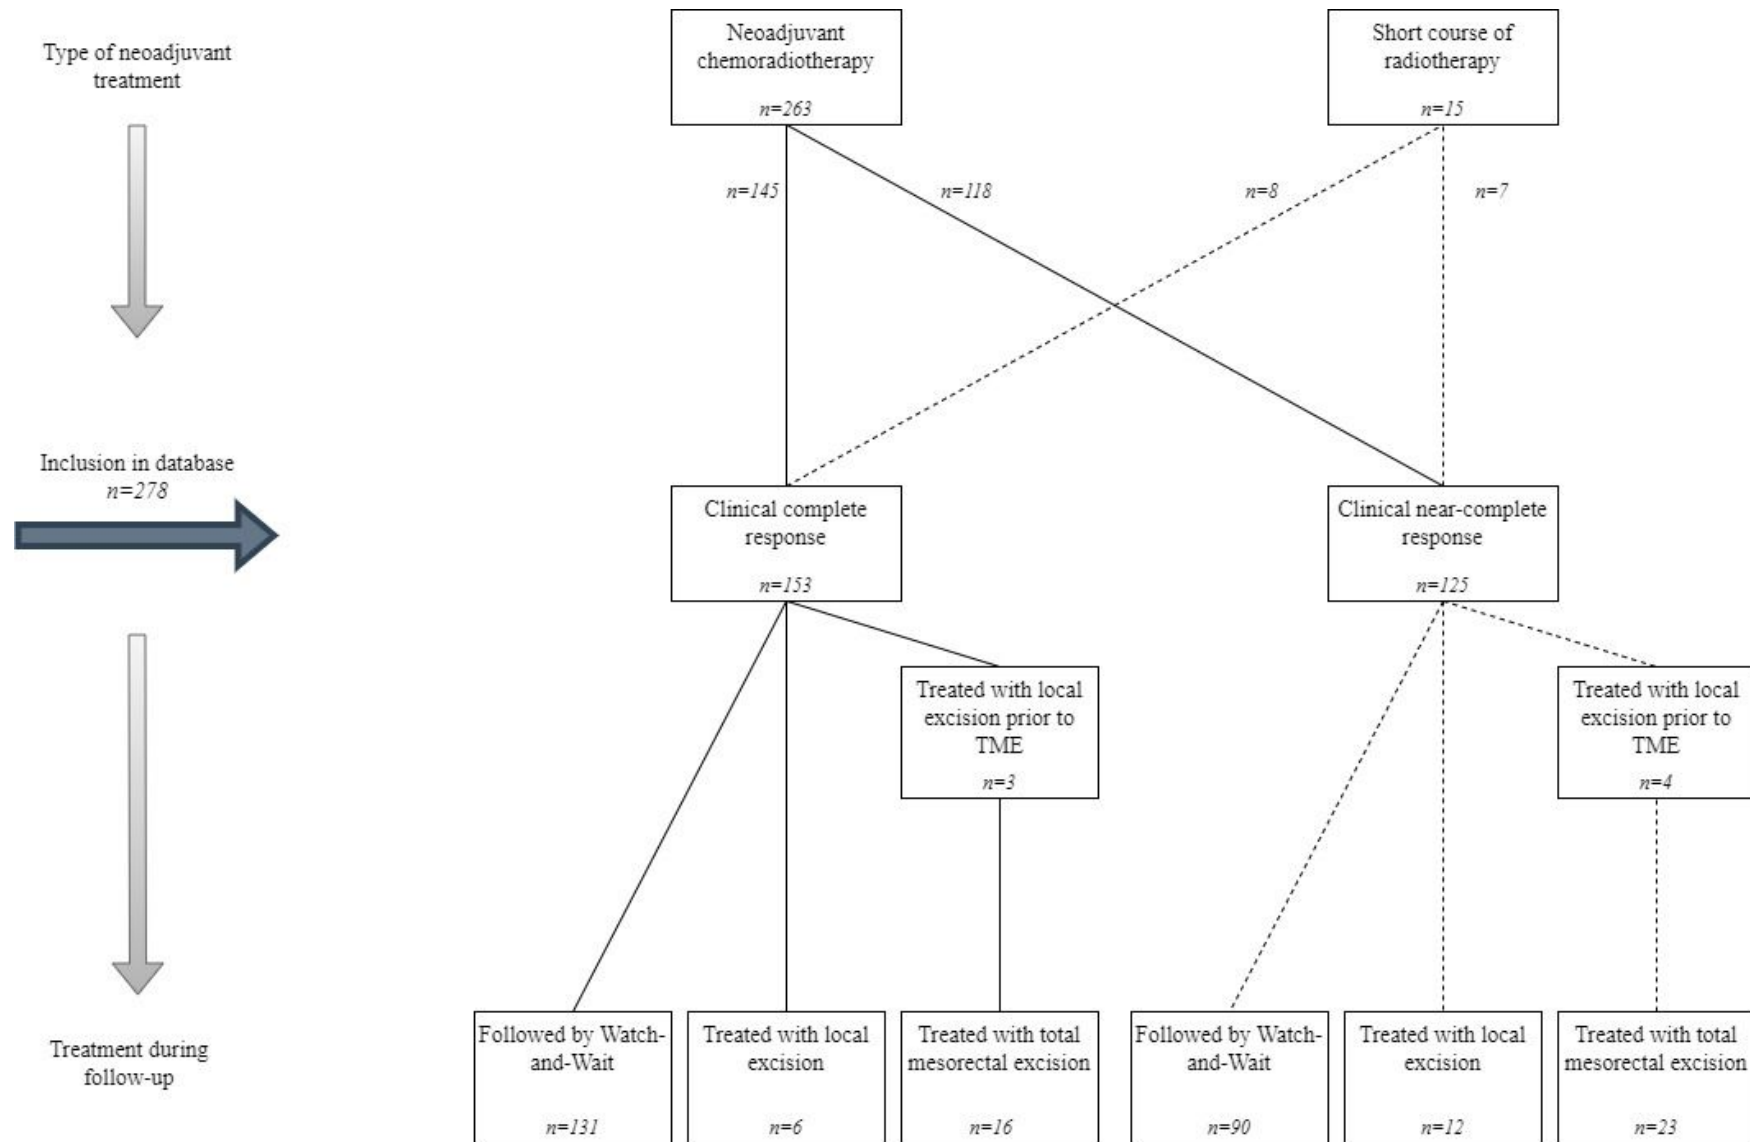

**eTable 1.** Quality of Life and Functional Outcome of Patients Followed by Watch and Wait Without Requiring Additional Surgery at 3, 12, and 24 Months Following Inclusion<sup>a</sup>

<sup>a</sup>measured with (A) the EORTC-QLQ-C30 and SF-36, (B) the EORTC-QLQ-CR29 and EORTC-QLQ-CR38, (C) the LARS score, Vaizey score, IPSS score, IIEF, and FSFI.

| A                          | 3 months    | 12 months   | 24 months   | 12 versus 3 months |         |                | 24 versus 3 months |         |                | 24 versus 12 months |         |                |
|----------------------------|-------------|-------------|-------------|--------------------|---------|----------------|--------------------|---------|----------------|---------------------|---------|----------------|
|                            | Mean (SD)   | Mean (SD)   | Mean (SD)   | Mean diff.         | p-value | Clinical sign. | Mean diff.         | p-value | Clinical sign. | Mean diff.          | p-value | Clinical sign. |
| <b>EORTC-QLQ-C30</b>       |             |             |             |                    |         |                |                    |         |                |                     |         |                |
| <i>Function scales</i>     |             |             |             |                    |         |                |                    |         |                |                     |         |                |
| Global health status       | 82.8 (14.6) | 84.7 (14.4) | 80.6 (20.1) | 1.9                | 0.05    | Trivial        | -2.2               | 0.09    | Trivial        | -4.1                | 0.002   | Trivial        |
| Physical functioning       | 90.5 (14.4) | 90.7 (14.0) | 91.0 (13.8) | 0.2                | 0.79    | Trivial        | 0.5                | 0.53    | Trivial        | 0.3                 | 0.68    | Trivial        |
| Emotional functioning      | 85.9 (16.7) | 88.7 (14.8) | 88.1 (14.6) | 2.8                | 0.009   | Trivial        | 2.2                | 0.05    | Trivial        | -0.6                | 0.46    | Trivial        |
| Cognitive functioning      | 88.2 (16.6) | 88.8 (15.4) | 88.6 (15.9) | 0.7                | 0.48    | Trivial        | 0.5                | 0.67    | Trivial        | -0.2                | 0.82    | Trivial        |
| Social functioning         | 89.0 (18.3) | 90.9 (16.2) | 92.9 (12.6) | 1.9                | 0.21    | Trivial        | 3.9                | 0.002   | Small          | 2.0                 | 0.10    | Trivial        |
| <i>Symptom scales</i>      |             |             |             |                    |         |                |                    |         |                |                     |         |                |
| Fatigue                    | 15.8 (17.8) | 15.3 (18.1) | 15.7 (20.0) | -0.5               | 0.73    | Trivial        | 0.1                | 0.94    | Trivial        | 0.4                 | 0.79    | Trivial        |
| Nausea                     | 1.9 (7.3)   | 1.4 (5.8)   | 2.9 (9.0)   | -0.5               | 0.37    | Trivial        | 1.1                | 0.14    | Trivial        | 1.6                 | 0.01    | Trivial        |
| Pain                       | 7.8 (19.3)  | 8.1 (19.2)  | 6.8 (16.2)  | 0.3                | 0.85    | Trivial        | -1.1               | 0.46    | Trivial        | -1.4                | 0.31    | Trivial        |
| Insomnia                   | 15.4 (23.2) | 15.1 (21.6) | 14.6 (22.5) | -0.3               | 0.84    | Trivial        | -0.8               | 0.63    | Trivial        | -0.5                | 0.78    | Trivial        |
| Appetite loss              | 2.7 (9.7)   | 2.4 (10.3)  | 3.2 (11.2)  | -0.3               | 0.73    | Trivial        | 0.5                | 0.63    | Trivial        | 0.8                 | 0.37    | Trivial        |
| Constipation               | 5.9 (13.9)  | 6.6 (15.1)  | 6.6 (15.4)  | 0.8                | 0.55    | Trivial        | 0.8                | 0.52    | Trivial        | 0.0                 | 1.00    | Trivial        |
| Diarrhea                   | 9.0 (17.4)  | 9.0 (17.4)  | 10.6 (20.1) | 0.0                | 1.00    | Trivial        | 1.5                | 0.30    | Trivial        | 1.5                 | 0.33    | Trivial        |
| Financial difficulties     | 4.8 (13.4)  | 3.8 (13.1)  | 4.8 (13.7)  | -1.1               | 0.16    | Trivial        | 0.0                | 1.00    | Trivial        | 1.1                 | 0.24    | Trivial        |
| <b>Short form-36</b>       |             |             |             |                    |         |                |                    |         |                |                     |         |                |
| <i>Function scales</i>     |             |             |             |                    |         |                |                    |         |                |                     |         |                |
| Physical functioning       | 85.9 (18.4) | 84.7 (20.6) | 84.2 (19.7) | -1.2               | 0.24    | ..             | -1.7               | 0.14    | ..             | -0.5                | 0.63    | ..             |
| Physical role functioning  | 74.2 (38.2) | 77.9 (36.6) | 79.1 (34.9) | 3.7                | 0.20    | ..             | 4.9                | 0.06    | ..             | 1.2                 | 0.65    | ..             |
| Bodily pain                | 89.4 (17.1) | 88.8 (15.8) | 87.5 (17.6) | -0.6               | 0.64    | ..             | -1.8               | 0.19    | ..             | -1.3                | 0.30    | ..             |
| General health             | 70.2 (17.9) | 73.0 (18.1) | 72.6 (20.6) | 2.8                | 0.01    | ..             | 2.4                | 0.10    | ..             | -0.4                | 0.76    | ..             |
| Vitality                   | 68.3 (15.0) | 68.6 (14.1) | 68.7 (15.6) | 0.3                | 0.76    | ..             | 0.4                | 0.70    | ..             | 0.1                 | 0.91    | ..             |
| Social functioning         | 87.5 (18.8) | 87.4 (17.2) | 88.2 (16.6) | -0.1               | 0.97    | ..             | 0.7                | 0.60    | ..             | 0.8                 | 0.52    | ..             |
| Emotional role functioning | 83.9 (31.9) | 86.4 (29.4) | 89.0 (26.1) | 2.6                | 0.27    | ..             | 5.1                | 0.04    | ..             | 2.6                 | 0.20    | ..             |
| Mental health              | 76.2 (14.1) | 77.2 (13.1) | 75.5 (14.5) | 1.0                | 0.16    | ..             | -0.7               | 0.48    | ..             | -1.7                | 0.04    | ..             |

| <b>B</b>                     | <b>3 months</b>  | <b>12 months</b> | <b>24 months</b> | <b>12 versus 3 months</b> |                | <b>24 versus 3 months</b> |                | <b>24 versus 12 months</b> |                |
|------------------------------|------------------|------------------|------------------|---------------------------|----------------|---------------------------|----------------|----------------------------|----------------|
|                              | <b>Mean (SD)</b> | <b>Mean (SD)</b> | <b>Mean (SD)</b> | <b>Mean diff.</b>         | <b>p-value</b> | <b>Mean diff.</b>         | <b>p-value</b> | <b>Mean diff.</b>          | <b>p-value</b> |
| <b>EORTC-QLQ-CR29</b>        |                  |                  |                  |                           |                |                           |                |                            |                |
| <b>Symptom scales/items</b>  |                  |                  |                  |                           |                |                           |                |                            |                |
| Urinary frequency            | 22.9 (20.7)      | 23.0 (18.8)      | 25.0 (18.0)      | -0.1                      | 0.94           | 2.2                       | 0.26           | 2.0                        | 0.22           |
| Urinary incontinence         | 4.6 (12.1)       | 7.9 (14.6)       | 9.2 (15.5)       | 3.3                       | 0.007          | 4.7                       | <0.001         | 1.3                        | 0.27           |
| Dysuria                      | 2.2 (8.8)        | 0.5 (3.0)        | 1.5 (6.3)        | -1.7                      | 0.02           | -0.7                      | 0.42           | 1.0                        | 0.04           |
| Abdominal pain               | 6.4 (14.4)       | 5.2 (13.5)       | 5.8 (12.8)       | -1.2                      | 0.43           | -0.6                      | 0.64           | 0.5                        | 0.66           |
| Buttock pain                 | 13.1 (23.6)      | 8.9 (16.6)       | 9.6 (15.7)       | -4.2                      | 0.03           | -3.5                      | 0.09           | 0.7                        | 0.65           |
| Bloating                     | 12.8 (20.6)      | 10.4 (18.5)      | 12.7 (17.6)      | -2.4                      | 0.21           | 0.1                       | 0.98           | 2.3                        | 0.12           |
| Blood and mucus in stool     | 6.3 (13.2)       | 4.8 (9.8)        | 4.6 (8.6)        | -1.4                      | 0.19           | -1.7                      | 0.14           | -0.2                       | 0.81           |
| Dry mouth                    | 17.6 (28.2)      | 8.1 (16.8)       | 7.2 (15.2)       | -9.6                      | <0.001         | -10.5                     | <0.001         | -0.9                       | 0.50           |
| Hair loss                    | 6.8 (22.8)       | 1.8 (6.9)        | 1.9 (6.9)        | -4.9                      | 0.01           | -4.9                      | 0.01           | 0.1                        | 0.93           |
| Taste                        | 6.0 (19.0)       | 3.5 (12.0)       | 1.4 (5.7)        | -2.5                      | 0.10           | -4.7                      | 0.004          | -2.2                       | 0.03           |
| Flatulence                   | 23.9 (26.2)      | 24.3 (22.7)      | 25.3 (21.8)      | 0.4                       | 0.86           | 1.4                       | 0.52           | 1.0                        | 0.56           |
| Fecal incontinence           | 8.9 (16.4)       | 9.2 (15.1)       | 7.9 (13.0)       | 0.3                       | 0.83           | -1.1                      | 0.47           | -1.4                       | 0.28           |
| Sore skin                    | 12.7 (21.7)      | 10.5 (18.8)      | 9.7 (16.7)       | -2.2                      | 0.20           | -3.0                      | 0.14           | -0.8                       | 0.61           |
| Stool frequency              | 14.0 (15.2)      | 12.7 (12.6)      | 11.6 (13.2)      | -1.3                      | 0.31           | -2.4                      | 0.08           | -1.1                       | 0.36           |
| Embarrassment                | 8.3 (17.1)       | 9.8 (17.8)       | 12.0 (17.1)      | 1.5                       | 0.32           | 3.7                       | 0.05           | 2.2                        | 0.21           |
| Impotence                    | 35.5 (38.7)      | 33.4 (31.6)      | 42.2 (32.4)      | -2.0                      | 0.56           | 6.7                       | 0.06           | 8.7                        | 0.007          |
| Dyspareunia                  | 26.8 (21.8)      | 20.3 (20.5)      | 21.5 (17.7)      | -6.5                      | 0.08           | -5.2                      | 0.09           | 1.3                        | 0.66           |
| <b>Function scales/items</b> |                  |                  |                  |                           |                |                           |                |                            |                |
| Anxiety                      | 74.9 (19.7)      | 77.9 (20.5)      | 82.3 (16.6)      | 3.0                       | 0.09           | 7.4                       | <0.001         | 4.5                        | 0.01           |
| Weight                       | 84.2 (22.4)      | 83.8 (23.7)      | 88.6 (18.7)      | -0.4                      | 0.82           | 4.4                       | 0.04           | 4.8                        | 0.02           |
| Body image                   | 86.7 (22.1)      | 91.2 (15.6)      | 91.4 (12.1)      | 4.5                       | 0.02           | 4.7                       | 0.02           | 0.2                        | 0.90           |
| Sexual interest (men)        | 60.0 (26.0)      | 62.8 (26.3)      | 62.6 (18.4)      | 2.5                       | 0.40           | 2.3                       | 0.36           | -0.2                       | 0.94           |
| Sexual interest (women)      | 82.9 (19.2)      | 81.6 (18.3)      | 80.0 (17.5)      | -1.3                      | 0.61           | -3.0                      | 0.30           | -1.6                       | 0.54           |
| <b>EORTC-QLQ-CR38</b>        |                  |                  |                  |                           |                |                           |                |                            |                |
| <b>Symptom scales/items</b>  |                  |                  |                  |                           |                |                           |                |                            |                |
| Micturition problems         | 16.4 (16.1)      | 14.9 (13.6)      | 14.6 (13.4)      | -1.5                      | 0.39           | -1.8                      | 0.24           | -0.3                       | 0.83           |
| Chemotherapy side effects    | 9.3 (11.7)       | 8.0 (9.6)        | 10.0 (12.4)      | -1.3                      | 0.34           | 0.7                       | 0.66           | 2.0                        | 0.16           |
| Symptoms of the GI tract     | 13.9 (10.7)      | 12.3 (10.8)      | 12.7 (10.1)      | -1.6                      | 0.20           | -1.2                      | 0.35           | 0.4                        | 0.69           |
| Male sexual problems         | 31.2 (26.8)      | 36.4 (29.5)      | 39.3 (25.7)      | 5.2                       | 0.13           | 8.1                       | 0.05           | 2.9                        | 0.46           |
| Female sexual problems       | 42.0 (29.1)      | 21.7 (18.9)      | 40.7 (16.8)      | -20.3                     | <0.001         | -1.3                      | 0.79           | 19.0                       | <0.001         |
| Defecation problems          | 10.1 (8.3)       | 8.4 (6.9)        | 8.3 (7.1)        | -1.7                      | 0.04           | -1.8                      | 0.03           | -0.1                       | 0.91           |

|                        | 3 months    | 12 months   | 24 months   | 12 versus 3 months |         | 24 versus 3 months |         | 24 versus 12 months |         |
|------------------------|-------------|-------------|-------------|--------------------|---------|--------------------|---------|---------------------|---------|
|                        | Mean (SD)   | Mean (SD)   | Mean (SD)   | Mean diff.         | p-value | Mean diff.         | p-value | Mean diff.          | p-value |
| Weight loss            | 6.5 (17.6)  | 4.3 (10.4)  | 6.2 (12.3)  | -2.2               | 0.33    | -0.3               | 0.89    | 1.9                 | 0.24    |
| <b>Function scales</b> |             |             |             |                    |         |                    |         |                     |         |
| Body image             | 91.6 (14.5) | 90.1 (16.3) | 92.1 (14.5) | -1.4               | 0.35    | 0.5                | 0.71    | 1.9                 | 0.20    |
| Sexual functioning     | 71.5 (21.3) | 71.4 (20.7) | 70.9 (15.8) | -0.1               | 0.95    | -0.7               | 0.73    | -0.5                | 0.77    |
| Sexual enjoyment       | 46.5 (21.6) | 48.9 (24.8) | 42.3 (20.6) | 2.5                | 0.37    | -4.2               | 0.12    | -6.7                | 0.02    |
| Future perspective     | 67.5 (18.0) | 72.9 (21.7) | 82.1 (19.9) | 5.4                | 0.03    | 14.6               | <0.001  | 9.2                 | 0.001   |

| <b>C</b>                                               | 3 months    | 12 months   | 24 months   | 12 versus 3 months |         | 24 versus 3 months |                    | 24 versus 12 months |                    |
|--------------------------------------------------------|-------------|-------------|-------------|--------------------|---------|--------------------|--------------------|---------------------|--------------------|
|                                                        |             |             |             | Mean diff.         | p-value | Mean diff.         | p-value            | Mean diff.          | p-value            |
| <b>Low Anterior Resection Syndrome (LARS) score</b>    |             |             |             |                    |         |                    |                    |                     |                    |
| <b>Mean</b>                                            |             |             |             |                    |         |                    |                    |                     |                    |
| Mean score (SD)                                        | 20.9 (11.2) | 21.0 (11.3) | 20.6 (11.3) | 0.1                | 0.94    | -0.3               | 0.68               | -0.4                | 0.62               |
| <b>Percentage</b>                                      |             |             |             |                    |         |                    |                    |                     |                    |
| % major LARS                                           | 25.3        | 24.0        | 24.9        |                    | 0.80    |                    | 1.00               |                     | 0.89               |
| <b>Vaizey incontinence score</b>                       |             |             |             |                    |         |                    |                    |                     |                    |
| <b>Mean</b>                                            |             |             |             |                    |         |                    |                    |                     |                    |
| Mean score (SD)                                        | 6.8 (4.3)   | 7.1 (4.0)   | 8.0 (4.4)   | 0.3                | 0.25    | 1.3                | <0.001             | 0.9                 | <0.001             |
| <b>Percentage</b>                                      |             |             |             |                    |         |                    |                    |                     |                    |
| % major incontinence                                   | 10.9        | 13.6        | 22.2        |                    | 0.42    |                    | 0.001              |                     | 0.009              |
| <b>International Prostate Symptom Score (IPSS)</b>     |             |             |             |                    |         |                    |                    |                     |                    |
| <b>Mean</b>                                            |             |             |             |                    |         |                    |                    |                     |                    |
| Mean score (SD)                                        | 5.2 (5.4)   | 5.9 (5.8)   | 5.5 (3.9)   | 0.7                | 0.19    | 0.3                | 0.47               | -0.4                | 0.36               |
| <b>Percentage</b>                                      |             |             |             |                    |         |                    |                    |                     |                    |
| % severe dysfunction                                   | 3.3         | 4.6         | 0.0         |                    | 0.77    |                    | Unable to estimate |                     | Unable to estimate |
| <b>International Index of Erectile Function (IIEF)</b> |             |             |             |                    |         |                    |                    |                     |                    |
| <b>Mean score (SD)</b>                                 |             |             |             |                    |         |                    |                    |                     |                    |
| Erectile function                                      | 15.0 (11.5) | 14.4 (10.1) | 14.5 (9.1)  | -0.6               | 0.41    | -0.5               | 0.56               | 0.2                 | 0.80               |
| Orgasmic function                                      | 5.4 (4.4)   | 5.6 (4.4)   | 5.4 (3.8)   | 0.2                | 0.60    | 0.1                | 0.87               | -0.1                | 0.69               |
| Sexual desire                                          | 5.6 (2.4)   | 5.5 (2.5)   | 5.5 (2.0)   | -0.1               | 0.56    | 0.0                | 0.91               | 0.1                 | 0.65               |

|                                            | 3 months    | 12 months   | 24 months   | 12 versus 3 months |         | 24 versus 3 months |         | 24 versus 12 months |         |
|--------------------------------------------|-------------|-------------|-------------|--------------------|---------|--------------------|---------|---------------------|---------|
|                                            |             |             |             | Mean diff.         | p-value | Mean diff.         | p-value | Mean diff.          | p-value |
| Intercourse satisfaction                   | 4.8 (5.4)   | 4.7 (4.9)   | 5.2 (4.6)   | -0.1               | 0.82    | 0.4                | 0.38    | 0.5                 | 0.18    |
| Overall satisfaction                       | 6.8 (2.7)   | 6.8 (2.3)   | 6.7 (2.3)   | -0.1               | 0.79    | -0.2               | 0.46    | -0.1                | 0.55    |
| Total IIEF score                           | 39.0 (20.7) | 37.0 (20.1) | 38.0 (18.6) | -2.0               | 0.15    | -1.0               | 0.51    | 0.9                 | 0.46    |
| <b>Percentage</b>                          |             |             |             |                    |         |                    |         |                     |         |
| % severe erectile dysfunction              | 43.0        | 41.1        | 31.8        |                    | 0.72    |                    | 0.03    |                     | 0.04    |
|                                            |             |             |             |                    |         |                    |         |                     |         |
| <b>Female Sexual Function Index (FSFI)</b> |             |             |             |                    |         |                    |         |                     |         |
| <b>Mean score (SD)</b>                     |             |             |             |                    |         |                    |         |                     |         |
| Desire                                     | 2.4 (1.2)   | 2.2 (1.0)   | 2.3 (1.0)   | -0.2               | 0.08    | -0.1               | 0.31    | 0.1                 | 0.38    |
| Arousal                                    | 1.9 (1.7)   | 1.9 (1.9)   | 1.9 (1.7)   | 0.1                | 0.76    | 0.1                | 0.77    | 0.0                 | 0.99    |
| Lubrication                                | 2.0 (2.1)   | 2.3 (2.1)   | 2.2 (1.9)   | 0.2                | 0.33    | 0.1                | 0.60    | -0.1                | 0.72    |
| Orgasm                                     | 2.3 (2.3)   | 2.1 (2.2)   | 2.2 (2.0)   | -0.1               | 0.53    | -0.1               | 0.83    | 0.1                 | 0.72    |
| Satisfaction                               | 3.9 (1.5)   | 4.2 (1.4)   | 3.5 (1.4)   | 0.3                | 0.07    | -0.4               | 0.04    | -0.7                | <0.001  |
| Pain                                       | 1.9 (2.2)   | 2.0 (2.1)   | 1.7 (1.9)   | 0.1                | 0.80    | -0.3               | 0.29    | -0.3                | 0.22    |
| Full scale score                           | 18.2 (8.1)  | 16.7 (8.1)  | 15.6 (7.4)  | -1.4               | 0.12    | -2.6               | 0.002   | -1.2                | 0.14    |
|                                            |             |             |             |                    |         |                    |         |                     |         |

**eTable 2.** Quality of Life and Functional Outcome of Patients Treated With Local Excision (LE) and Patients Treated With Total Mesorectal Excision (TME) Compared to Patients Followed by Watch-and-Wait Without Requiring Additional Surgery (W&W) at 24 Months Following Inclusion<sup>a</sup>

<sup>a</sup> measured with (A) the EORTC-QLQ-C30 and SF-36, (B) the EORTC-QLQ-CR29 and EORTC-QLQ-CR38, (C) the LARS score, Vaizey score, IPSS score, IIEF, and FSFI. CI = confidence interval. \* = subscales or scores were not completed by patients with a colostomy.

| A                          | LE                                     |      |      |              |         | TME                                    |      |       |              |         |
|----------------------------|----------------------------------------|------|------|--------------|---------|----------------------------------------|------|-------|--------------|---------|
|                            | (reference: patients in the W&W group) |      |      |              |         | (reference: patients in the W&W group) |      |       |              |         |
|                            | N                                      | Mean | B    | 95% CI       | p-value | N                                      | Mean | B     | 95% CI       | p-value |
| <b>EORTC-QLQ-C30</b>       |                                        |      |      |              |         |                                        |      |       |              |         |
| <i>Function scales</i>     |                                        |      |      |              |         |                                        |      |       |              |         |
| Global health status       | 18                                     | 83.8 | 3.2  | -7.0 – 13.4  | 0.54    | 39                                     | 68.4 | -12.2 | -19.5 – -5.0 | 0.001   |
| Physical functioning       | 18                                     | 88.2 | -2.8 | -9.8 – 4.1   | 0.42    | 39                                     | 86.0 | -5.0  | -9.9 – -0.1  | 0.05    |
| Emotional functioning      | 18                                     | 90.3 | 2.2  | -5.2 – 9.6   | 0.56    | 39                                     | 81.6 | -6.5  | -11.7 – -1.2 | 0.02    |
| Cognitive functioning      | 18                                     | 81.5 | -7.1 | -15.3 – -1.1 | 0.09    | 39                                     | 86.3 | -2.3  | -8.1 – 3.5   | 0.44    |
| Social functioning         | 18                                     | 87.0 | -5.9 | -12.8 – 1.0  | 0.10    | 39                                     | 82.9 | -10.0 | -14.9 – -5.1 | <0.001  |
| <i>Symptom scales</i>      |                                        |      |      |              |         |                                        |      |       |              |         |
| Fatigue                    | 18                                     | 10.2 | -5.5 | -15.6 – 4.6  | 0.29    | 39                                     | 23.1 | 7.4   | 2.8 – 14.6   | 0.04    |
| Nausea                     | 18                                     | 0.0  | -2.9 | -7.3 – 1.4   | 0.18    | 39                                     | 4.7  | 1.8   | -1.3 – 4.8   | 0.26    |
| Pain                       | 18                                     | 3.7  | -3.1 | -11.7 – 5.6  | 0.48    | 39                                     | 23.9 | 17.1  | 11.0 – 23.3  | <0.001  |
| Insomnia                   | 18                                     | 9.3  | -5.4 | -16.6 – 5.9  | 0.35    | 39                                     | 21.4 | 6.7   | -1.2 – 14.7  | 0.10    |
| Appetite loss              | 18                                     | 3.7  | 0.5  | -5.9 – 6.9   | 0.87    | 39                                     | 11.1 | 7.9   | 3.4 – 12.5   | 0.001   |
| Constipation               | 18                                     | 1.9  | -4.8 | -12.3 – 2.7  | 0.21    | 39                                     | 8.6  | 1.9   | -3.4 – 7.2   | 0.48    |
| Diarrhea                   | 18                                     | 1.9  | -8.7 | -18.3 – 0.9  | 0.08    | 39                                     | 15.4 | 4.8   | -2.0 – 11.6  | 0.17    |
| Financial difficulties     | 18                                     | 1.9  | -3.0 | -10.3 – 4.4  | 0.43    | 39                                     | 13.7 | 8.8   | 3.6 – 14.1   | 0.001   |
| <b>Short form-36</b>       |                                        |      |      |              |         |                                        |      |       |              |         |
| <i>Function scales</i>     |                                        |      |      |              |         |                                        |      |       |              |         |
| Physical functioning       | 18                                     | 79.2 | -5.0 | -15.1 – 5.0  | 0.32    | 39                                     | 73.0 | -11.3 | -18.4 – -4.2 | 0.002   |
| Physical role functioning  | 18                                     | 79.2 | 0.1  | -17.1 – 17.3 | 0.99    | 39                                     | 62.8 | -16.3 | -28.4 – -4.1 | 0.009   |
| Bodily pain                | 18                                     | 92.1 | 4.6  | -4.1 – 13.3  | 0.30    | 39                                     | 77.3 | -10.2 | -16.4 – -4.1 | 0.001   |
| General health             | 18                                     | 71.1 | -1.5 | -11.8 – 8.9  | 0.78    | 39                                     | 65.5 | -7.1  | -14.4 – -0.2 | 0.06    |
| Vitality                   | 18                                     | 65.7 | -3.0 | -10.7 – 4.7  | 0.45    | 39                                     | 65.1 | -3.6  | -9.0 – 1.9   | 0.20    |
| Social functioning         | 18                                     | 88.2 | 0.0  | -8.7 – 8.6   | 0.99    | 39                                     | 76.0 | -12.3 | -18.4 – -6.1 | <0.001  |
| Emotional role functioning | 18                                     | 81.5 | -7.5 | -21.1 – 6.1  | 0.28    | 39                                     | 78.6 | -10.4 | -20.0 – -0.7 | 0.04    |
| Mental health              | 18                                     | 70.9 | -4.5 | -11.8 – 4.6  | 0.22    | 39                                     | 65.8 | -9.7  | -14.9 – -4.6 | <0.001  |

| B                            | LE                                     |      |       |              |         | TME                                    |      |       |              |         |
|------------------------------|----------------------------------------|------|-------|--------------|---------|----------------------------------------|------|-------|--------------|---------|
|                              | (reference: patients in the W&W group) |      |       |              |         | (reference: patients in the W&W group) |      |       |              |         |
|                              | N                                      | Mean | B     | 95% CI       | p-value | N                                      | Mean | B     | 95% CI       | p-value |
| <b>EORTC-QLQ-CR29</b>        |                                        |      |       |              |         |                                        |      |       |              |         |
| <b>Symptom scales/items</b>  |                                        |      |       |              |         |                                        |      |       |              |         |
| Urinary frequency            | 15                                     | 23.6 | -1.4  | -11.4 – 8.6  | 0.78    | 35                                     | 35.0 | 9.9   | 2.9 – 16.9   | 0.006   |
| Urinary incontinence         | 15                                     | 10.2 | 1.0   | -8.5 – 10.4  | 0.84    | 35                                     | 16.3 | 7.1   | 0.5 – 13.6   | 0.04    |
| Dysuria                      | 15                                     | 0.1  | -1.4  | -4.8 – 2.0   | 0.41    | 35                                     | 2.2  | 0.7   | -1.7 – 3.1   | 0.57    |
| Abdominal pain               | 15                                     | 5.6  | -0.2  | -7.7 – 7.3   | 0.95    | 35                                     | 12.8 | 7.0   | 1.8 – 12.2   | 0.009   |
| Buttock pain                 | 15                                     | 14.5 | 4.9   | -4.8 – 14.6  | 0.32    | 35                                     | 18.5 | 8.9   | 2.2 – 15.6   | 0.01    |
| Bloating                     | 15                                     | 3.8  | -8.9  | -18.8 – 0.9  | 0.07    | 35                                     | 17.8 | 5.0   | -1.8 – 11.9  | 0.15    |
| Blood and mucus in stool     | 15                                     | 1.2  | -3.4  | -7.8 – 0.9   | 0.12    | 35                                     | 4.3  | -0.3  | -3.4 – 2.7   | 0.83    |
| Dry mouth                    | 15                                     | 7.7  | 0.5   | -8.0 – 9.0   | 0.90    | 35                                     | 15.3 | 8.1   | 2.1 – 14.0   | 0.008   |
| Hair loss                    | 15                                     | 0.4  | -1.6  | -5.2 – 2.1   | 0.40    | 35                                     | 2.2  | 0.3   | -2.3 – 2.8   | 0.83    |
| Taste                        | 15                                     | 2.5  | 1.1   | -2.7 – 4.9   | 0.57    | 35                                     | 4.5  | 3.1   | 0.4 – 5.7    | 0.02    |
| Flatulence*                  | 15                                     | 35.9 | 10.5  | -1.7 – 22.8  | 0.09    | 3                                      | 27.1 | 1.8   | -24.4 – 28.0 | 0.89    |
| Fecal incontinence*          | 15                                     | 10.4 | 2.6   | -4.5 – 9.6   | 0.47    | 3                                      | 1.3  | -6.6  | -21.7 – 8.5  | 0.39    |
| Sore skin*                   | 15                                     | 10.9 | 1.3   | -7.8 – 10.4  | 0.79    | 3                                      | 12.2 | 2.6   | -17.0 – 22.1 | 0.80    |
| Stool frequency*             | 15                                     | 16.3 | 4.7   | -2.5 – 12.0  | 0.20    | 3                                      | 25.5 | 13.9  | -1.7 – 29.4  | 0.08    |
| Embarrassment*               | 15                                     | 18.1 | 6.1   | -3.2 – 15.4  | 0.20    | 3                                      | 26.6 | 14.6  | -5.4 – 34.6  | 0.15    |
| Impotence                    | 9                                      | 38.5 | -3.7  | -26.0 – 18.7 | 0.75    | 23                                     | 55.8 | 13.6  | -1.3 – 28.5  | 0.07    |
| Dyspareunia                  | 6                                      | 33.0 | 11.5  | -6.2 – 29.2  | 0.20    | 12                                     | 27.7 | 6.2   | -7.1 – 19.4  | 0.36    |
| <b>Function scales/items</b> |                                        |      |       |              |         |                                        |      |       |              |         |
| Anxiety                      | 15                                     | 70.5 | -11.8 | -21.3 – -2.3 | 0.02    | 35                                     | 77.5 | -4.9  | -11.5 – 1.8  | 0.15    |
| Weight                       | 15                                     | 94.5 | 5.9   | -3.7 – 15.5  | 0.23    | 35                                     | 85.6 | -3.0  | -9.7 – 3.7   | 0.38    |
| Body image                   | 15                                     | 93.9 | 2.5   | -5.7 – 10.7  | 0.55    | 35                                     | 80.3 | -11.1 | -16.8 – -5.4 | <0.001  |
| Sexual interest (men)        | 9                                      | 69.9 | 7.3   | -6.7 – 21.4  | 0.30    | 23                                     | 65.1 | 2.5   | -6.8 – 11.9  | 0.59    |
| Sexual interest (women)      | 6                                      | 86.1 | 6.1   | -9.4 – 21.6  | 0.44    | 12                                     | 81.0 | 1.0   | -10.6 – 12.7 | 0.86    |
| <b>EORTC-QLQ-CR38</b>        |                                        |      |       |              |         |                                        |      |       |              |         |
| <b>Symptom scales/items</b>  |                                        |      |       |              |         |                                        |      |       |              |         |
| Micturition problems         | 3                                      | 13.2 | -1.4  | -16.6 – 13.9 | 0.86    | 4                                      | 17.7 | 3.1   | -10.2 – 16.4 | 0.64    |
| Chemotherapy side effects    | 3                                      | 12.9 | 2.9   | -11.2 – 17.0 | 0.68    | 4                                      | 12.3 | 2.3   | -10.0 – 14.5 | 0.72    |
| Symptoms of the GI tract     | 3                                      | 12.2 | -0.5  | -12.1 – 11.0 | 0.93    | 4                                      | 13.8 | 1.1   | -9.0 – 11.1  | 0.83    |
| Male sexual problems         | 2                                      | 36.1 | -3.3  | -39.7 – 33.1 | 0.86    | 2                                      | 41.2 | 1.9   | -34.5 – 38.3 | 0.92    |
| Female sexual problems       | 1                                      | 39.7 | -1.0  | -35.5 – 33.6 | 0.96    | 2                                      | 43.8 | 3.1   | -21.8 – 27.9 | 0.80    |



|                        | LE                                     |      |      |              |         | TME                                    |      |      |              |         |
|------------------------|----------------------------------------|------|------|--------------|---------|----------------------------------------|------|------|--------------|---------|
|                        | (reference: patients in the W&W group) |      |      |              |         | (reference: patients in the W&W group) |      |      |              |         |
|                        | N                                      | Mean | B    | 95% CI       | p-value | N                                      | Mean | B    | 95% CI       | p-value |
| Defecation problems*   | 3                                      | 7.3  | -1.0 | -9.2 – 7.2   | 0.81    | 0                                      | ..   | ..   | ..           | ..      |
| Weight loss            | 3                                      | 9.3  | 3.1  | -10.9 – 17.1 | 0.66    | 4                                      | 9.3  | 3.1  | -9.1 – 15.2  | 0.62    |
| <b>Function scales</b> |                                        |      |      |              |         |                                        |      |      |              |         |
| Body image             | 3                                      | 93.1 | 1.1  | -15.5 – 17.6 | 0.90    | 4                                      | 90.4 | -1.7 | -16.1 – 12.7 | 0.82    |
| Sexual functioning     | 3                                      | 74.7 | 3.8  | -14.1 – 21.8 | 0.67    | 4                                      | 68.2 | -2.7 | -18.4 – 12.9 | 0.73    |
| Sexual enjoyment       | 3                                      | 36.0 | -6.3 | -29.8 – 17.1 | 0.59    | 4                                      | 38.3 | -4.0 | -24.4 – 16.4 | 0.70    |
| Future perspective     | 3                                      | 79.3 | -2.9 | -25.4 – 19.7 | 0.80    | 4                                      | 80.7 | -1.4 | -21.1 – 18.3 | 0.89    |

| C                                                      | LE                                     |          |     |            |         | TME                                    |          |     |             |         |
|--------------------------------------------------------|----------------------------------------|----------|-----|------------|---------|----------------------------------------|----------|-----|-------------|---------|
|                                                        | (reference: patients in the W&W group) |          |     |            |         | (reference: patients in the W&W group) |          |     |             |         |
|                                                        | N                                      | Mean / % | B   | 95% CI     | p-value | N                                      | Mean / % | B   | 95% CI      | p-value |
| <b>Low Anterior Resection Syndrome (LARS) score</b>    |                                        |          |     |            |         |                                        |          |     |             |         |
| <i>Mean</i>                                            |                                        |          |     |            |         |                                        |          |     |             |         |
| Mean score                                             | 18                                     | 28.2     | 7.6 | 2.2 – 13.0 | 0.006   | 3                                      | 28.3     | 7.7 | -5.2 – 20.6 | 0.24    |
| <i>Percentage</i>                                      |                                        |          |     |            |         |                                        |          |     |             |         |
| % major LARS                                           | 18                                     | 55.6     |     |            | 0.01    | 3                                      | 66.7     |     |             | 0.16    |
| <b>Vaizey incontinence score</b>                       |                                        |          |     |            |         |                                        |          |     |             |         |
| <i>Mean</i>                                            |                                        |          |     |            |         |                                        |          |     |             |         |
| Mean score                                             | 18                                     | 8.7      | 0.7 | -1.4 – 2.7 | 0.54    | 3                                      | 11.7     | 3.7 | -1.3 – 8.6  | 0.15    |
| <i>Percentage</i>                                      |                                        |          |     |            |         |                                        |          |     |             |         |
| % major incontinence                                   | 18                                     | 22.2     |     |            | 1.00    | 3                                      | 66.7     |     |             | 0.13    |
| <b>International Prostate Symptom Score (IPSS)</b>     |                                        |          |     |            |         |                                        |          |     |             |         |
| <i>Mean</i>                                            |                                        |          |     |            |         |                                        |          |     |             |         |
| Mean score                                             | 11                                     | 5.7      | 0.2 | -2.5 – 2.8 | 0.90    | 25                                     | 7.2      | 1.7 | -0.2 – 3.5  | 0.07    |
| <i>Percentage</i>                                      |                                        |          |     |            |         |                                        |          |     |             |         |
| % severe dysfunction                                   | 11                                     | 0.0      |     |            | 1.00    | 25                                     | 4.0      |     |             | 0.14    |
| <b>International Index of Erectile Function (IIEF)</b> |                                        |          |     |            |         |                                        |          |     |             |         |
| <i>Mean score</i>                                      |                                        |          |     |            |         |                                        |          |     |             |         |

|                                            | LE                                     |          |      |              |         | TME                                    |          |      |             |         |
|--------------------------------------------|----------------------------------------|----------|------|--------------|---------|----------------------------------------|----------|------|-------------|---------|
|                                            | (reference: patients in the W&W group) |          |      |              |         | (reference: patients in the W&W group) |          |      |             |         |
|                                            | N                                      | Mean / % | B    | 95% CI       | p-value | N                                      | Mean / % | B    | 95% CI      | p-value |
| Erectile function                          | 11                                     | 15.3     | 0.8  | -4.8 – 6.3   | 0.78    | 25                                     | 11.3     | -3.2 | -7.0 – 0.6  | 0.10    |
| Orgasmic function                          | 11                                     | 4.5      | -0.9 | -3.3 – 1.4   | 0.43    | 25                                     | 5.5      | 0.0  | -1.6 – 1.7  | 0.95    |
| Sexual desire                              | 11                                     | 5.2      | -0.4 | -1.6 – 0.9   | 0.54    | 25                                     | 5.6      | 0.0  | -0.8 – 0.9  | 0.92    |
| Intercourse satisfaction                   | 11                                     | 4.4      | -0.8 | -3.6 – 2.0   | 0.57    | 25                                     | 3.9      | -1.2 | -3.2 – 0.7  | 0.21    |
| Overall satisfaction                       | 11                                     | 6.7      | 0.0  | -1.4 – 1.4   | 0.98    | 25                                     | 6.3      | -0.4 | -1.4 – 0.6  | 0.44    |
| Total IIEF score                           | 11                                     | 37.4     | -0.6 | -11.9 – 10.8 | 0.92    | 25                                     | 33.9     | -4.0 | -11.9 – 3.8 | 0.31    |
| <b>Percentage</b>                          |                                        |          |      |              |         |                                        |          |      |             |         |
| % severe erectile dysfunction              |                                        | 27.3     |      |              | 1.00    |                                        | 44.0     |      |             | 0.26    |
| <b>Female Sexual Function Index (FSFI)</b> |                                        |          |      |              |         |                                        |          |      |             |         |
| <b>Mean score</b>                          |                                        |          |      |              |         |                                        |          |      |             |         |
| Desire                                     | 7                                      | 2.1      | -0.2 | -1.0 – 0.6   | 0.61    | 14                                     | 2.3      | 0.0  | -0.6 – 0.6  | 0.93    |
| Arousal                                    | 7                                      | 1.8      | -0.2 | -1.5 – 1.1   | 0.77    | 14                                     | 2.3      | 0.3  | -0.7 – 1.3  | 0.54    |
| Lubrication                                | 7                                      | 2.4      | 0.2  | -1.3 – 1.8   | 0.75    | 14                                     | 2.6      | 0.4  | -0.7 – 1.6  | 0.45    |
| Orgasm                                     | 7                                      | 1.9      | -0.3 | -1.9 – 1.3   | 0.70    | 14                                     | 3.0      | 0.8  | -0.4 – 1.9  | 0.19    |
| Satisfaction                               | 7                                      | 3.3      | -0.2 | -1.3 – 0.9   | 0.74    | 14                                     | 3.2      | -0.3 | -1.2 – 0.5  | 0.43    |
| Pain                                       | 7                                      | 1.4      | -0.3 | -1.8 – 1.2   | 0.68    | 14                                     | 1.8      | 0.1  | -1.0 – 1.2  | 0.86    |
| Full scale score                           | 7                                      | 13.7     | -1.9 | -8.0 – 4.1   | 0.53    | 14                                     | 15.3     | -0.3 | -4.7 – 4.2  | 0.91    |

**eTable 3.** Association of Sex, Age, Tumor Distance, and Neoadjuvant Treatment on Quality of Life and Functional Outcome at 24 Months Following Inclusion <sup>a</sup> measured with (A) the EORTC-QLQ-C30 and SF-36, (B) the EORTC-QLQ-CR29 and EORTC-QLQ-CR38, (C) the LARS score, Vaizey score, IPSS score, IIEF, and FSFI of patients followed by Watch-and-Wait without requiring additional surgery. CI = confidence interval. \* = subscales were not completed by patients with a colostomy.

| A                          | Independent variables  |              |         |                        |             |         |                        |            |         |                             |              |         |
|----------------------------|------------------------|--------------|---------|------------------------|-------------|---------|------------------------|------------|---------|-----------------------------|--------------|---------|
|                            | Sex                    |              |         | Age                    |             |         | Tumour distance        |            |         | Neoadjuvant treatment       |              |         |
|                            | (female patients)      |              |         | (years)                |             |         | (cm)                   |            |         | (short-course radiotherapy) |              |         |
|                            | Regression coefficient | 95%CI        | p-value | Regression coefficient | 95%CI       | p-value | Regression coefficient | 95%CI      | p-value | Regression coefficient      | 95%CI        | p-value |
| <b>EORTC-QLQ-C30</b>       |                        |              |         |                        |             |         |                        |            |         |                             |              |         |
| <i>Function scales</i>     |                        |              |         |                        |             |         |                        |            |         |                             |              |         |
| Global health status       | 1.0                    | -4.7 – 6.7   | 0.73    | 0.1                    | -0.2 – 0.4  | 0.36    | -0.3                   | -1.1 – 0.5 | 0.44    | -9.1                        | -23.2 – 5.2  | 0.21    |
| Physical functioning       | -3.1                   | -7.0 – 0.8   | 0.12    | -0.3                   | -0.5 – -0.1 | 0.002   | 0.0                    | -0.5 – 0.6 | 0.97    | -7.9                        | -17.7 – 1.8  | 0.11    |
| Emotional functioning      | -1.4                   | -5.5 – 2.8   | 0.51    | 0.2                    | -0.1 – 0.4  | 0.16    | -0.4                   | -1.0 – 0.2 | 0.21    | -6.0                        | -16.3 – 4.3  | 0.25    |
| Cognitive functioning      | -0.8                   | -5.3 – 3.8   | 0.74    | 0.2                    | -0.1 – 0.4  | 0.17    | -0.5                   | -1.2 – 0.1 | 0.11    | 1.0                         | -10.3 – 12.3 | 0.86    |
| Social functioning         | -0.1                   | -3.7 – 3.5   | 0.97    | 0.2                    | 0.0 – 0.3   | 0.09    | -0.4                   | -0.9 – 0.1 | 0.08    | 0.9                         | -8.1 – 9.8   | 0.85    |
| <i>Symptom scales</i>      |                        |              |         |                        |             |         |                        |            |         |                             |              |         |
| Fatigue                    | -2.7                   | -8.4 – 3.0   | 0.35    | -0.4                   | -0.7 – -0.1 | 0.008   | 0.6                    | -0.2 – 1.4 | 0.15    | 0.3                         | -13.9 – 14.6 | 0.96    |
| Nausea                     | 2.7                    | 0.1 – 5.2    | 0.04    | 0.0                    | -0.1 – 0.2  | 0.67    | 0.2                    | -0.2 – 0.5 | 0.38    | 5.6                         | -0.8 – 12.0  | 0.08    |
| Pain                       | 4.0                    | -0.6 – 8.6   | 0.09    | -0.1                   | -0.3 – 0.2  | 0.48    | 0.2                    | -0.4 – 0.9 | 0.48    | 5.9                         | -5.6 – 17.4  | 0.31    |
| Insomnia                   | 0.9                    | -5.5 – 7.3   | 0.79    | -0.4                   | -0.7 – 0.0  | 0.03    | 0.3                    | -0.6 – 1.2 | 0.48    | -6.5                        | -22.5 – 9.5  | 0.42    |
| Appetite loss              | 4.4                    | 1.3 – 7.6    | 0.006   | -0.1                   | -0.2 – 0.1  | 0.37    | 0.2                    | -0.2 – 0.7 | 0.36    | 9.7                         | 1.8 – 17.6   | 0.02    |
| Constipation               | 4.9                    | 0.6 – 9.3    | 0.03    | -0.1                   | -0.4 – 0.1  | 0.20    | 0.0                    | -0.7 – 0.6 | 0.93    | 1.8                         | -9.2 – 12.7  | 0.75    |
| Diarrhea                   | 6.9                    | 1.2 – 12.5   | 0.02    | 0.1                    | -0.2 – 0.4  | 0.33    | 0.1                    | -0.7 – 0.9 | 0.87    | 15.0                        | 0.8 – 29.1   | 0.04    |
| Financial difficulties     | -2.2                   | -6.1 – 1.7   | 0.27    | -0.3                   | -0.5 – -0.1 | 0.009   | 0.1                    | -0.5 – 0.6 | 0.80    | -5.0                        | -14.8 – 4.7  | 0.31    |
| <b>Short form-36</b>       |                        |              |         |                        |             |         |                        |            |         |                             |              |         |
| <i>Function scales</i>     |                        |              |         |                        |             |         |                        |            |         |                             |              |         |
| Physical functioning       | -3.7                   | -9.2 – 1.9   | 0.20    | -0.6                   | -0.8 – -0.3 | <0.001  | 0.5                    | -0.3 – 1.3 | 0.20    | -14.1                       | -28.0 – -0.2 | 0.05    |
| Physical role functioning  | 1.9                    | -8.1 – 11.8  | 0.71    | -0.1                   | -0.6 – 0.4  | 0.68    | 0.1                    | -1.3 – 1.5 | 0.92    | -20.4                       | -45.1 – 4.2  | 0.10    |
| Bodily pain                | -5.3                   | -10.3 – -0.4 | 0.04    | 0.1                    | -0.2 – 0.3  | 0.52    | -0.5                   | -1.2 – 0.2 | 0.17    | -8.0                        | -20.2 – 4.8  | 0.23    |
| General health             | -0.1                   | -6.0 – 5.8   | 0.97    | -0.1                   | -0.4 – 0.2  | 0.47    | -0.4                   | -1.2 – 0.5 | 0.39    | -6.6                        | -21.2 – 8.1  | 0.38    |
| Vitality                   | -5.7                   | -10.1 – -1.3 | 0.01    | 0.1                    | -0.1 – 0.3  | 0.50    | 0.0                    | -0.6 – 0.7 | 0.92    | -1.7                        | -12.8 – 9.4  | 0.76    |
| Social functioning         | 0.5                    | -4.2 – 5.2   | 0.84    | -0.1                   | -0.3 – 0.2  | 0.68    | 0.0                    | -0.6 – 0.7 | 0.90    | -5.6                        | -17.4 – 6.1  | 0.35    |
| Emotional role functioning | -2.7                   | -10.1 – 4.7  | 0.48    | -0.1                   | -0.5 – 0.3  | 0.68    | 0.2                    | -0.8 – 1.3 | 0.66    | -27.5                       | -45.7 – -9.3 | 0.003   |
| Mental health              | -3.7                   | -7.8 – 0.4   | 0.08    | 0.1                    | -0.1 – 0.3  | 0.18    | 0.1                    | -0.4 – 0.7 | 0.63    | -9.7                        | -19.9 – 0.5  | 0.06    |
| Body image                 | 3.7                    | -3.1 – 10.6  | 0.28    | -0.1                   | -0.5 – 0.3  | 0.61    | 0.5                    | -0.5 – 1.5 | 0.34    | 8.0                         | -21.1 – 37.2 | 0.59    |

| B                            | Independent variables  |              |         |                        |             |         |                        |             |         |                             |              |         |
|------------------------------|------------------------|--------------|---------|------------------------|-------------|---------|------------------------|-------------|---------|-----------------------------|--------------|---------|
|                              | Sex                    |              |         | Age                    |             |         | Tumour distance        |             |         | Neoadjuvant treatment       |              |         |
|                              | (female patients)      |              |         | (years)                |             |         | (cm)                   |             |         | (short-course radiotherapy) |              |         |
|                              | Regression coefficient | 95%CI        | p-value | Regression coefficient | 95%CI       | p-value | Regression coefficient | 95%CI       | p-value | Regression coefficient      | 95%CI        | p-value |
| <b>EORTC-QLQ-CR29</b>        |                        |              |         |                        |             |         |                        |             |         |                             |              |         |
| <b>Symptom scales/items</b>  |                        |              |         |                        |             |         |                        |             |         |                             |              |         |
| Urinary frequency            | 0.4                    | -6.1 – 7.0   | 0.90    | 0.2                    | -0.1 – 0.6  | 0.14    | -0.4                   | -1.3 – 0.5  | 0.35    | 2.3                         | -11.6 – 16.2 | 0.74    |
| Urinary incontinence         | 5.7                    | 0.2 – 11.3   | 0.04    | 0.1                    | -0.2 – 0.4  | 0.46    | 0.0                    | -0.8 – 0.9  | 0.91    | 0.3                         | -11.7 – 12.2 | 0.97    |
| Dysuria                      | 0.4                    | -1.9 – 2.7   | 0.75    | 0.0                    | -0.1 – 0.1  | 0.92    | -0.2                   | -0.5 – 0.1  | 0.23    | -1.2                        | -6.0 – 3.7   | 0.64    |
| Abdominal pain               | 2.9                    | -1.8 – 7.5   | 0.22    | -0.2                   | -0.4 – 0.0  | 0.07    | -0.4                   | -1.0 – 0.3  | 0.28    | 0.7                         | -9.2 – 10.5  | 0.89    |
| Buttock pain                 | 7.5                    | 1.9 – 13.0   | 0.009   | -0.2                   | -0.5 – 0.1  | 0.12    | -0.8                   | -1.6 – -0.1 | 0.034   | 1.2                         | -10.9 – 13.3 | 0.84    |
| Bloating                     | 3.0                    | -3.4 – 9.3   | 0.36    | -0.2                   | -0.5 – 0.1  | 0.18    | -0.4                   | -1.3 – 0.4  | 0.32    | -2.8                        | -16.3 – 10.8 | 0.69    |
| Blood and mucus in stool     | 1.2                    | -1.9 – 4.3   | 0.46    | -0.1                   | -0.2 – 0.1  | 0.51    | -0.2                   | -0.7 – 0.2  | 0.32    | -0.4                        | -7.0 – 6.2   | 0.91    |
| Dry mouth                    | 4.8                    | -0.7 – 10.2  | 0.09    | 0.1                    | -0.1 – 0.4  | 0.34    | -0.6                   | -1.4 – 0.2  | 0.15    | 6.3                         | -5.3 – 18.0  | 0.28    |
| Hair loss                    | 2.3                    | 0.1 – 4.8    | 0.06    | 0.2                    | 0.0 – 0.3   | 0.01    | -0.1                   | -0.5 – 0.3  | 0.63    | 3.6                         | -1.7 – 8.8   | 0.18    |
| Taste                        | 1.2                    | -0.9 – 3.2   | 0.26    | -0.1                   | -0.2 – 0.0  | 0.24    | -0.1                   | -0.4 – 0.2  | 0.44    | -0.9                        | -5.2 – 3.5   | 0.70    |
| Flatulence                   | 8.9                    | 1.1 – 16.7   | 0.03    | -0.4                   | -0.7 – 0.1  | 0.06    | -0.6                   | -1.7 – 0.5  | 0.26    | -5.9                        | -22.6 – 10.9 | 0.49    |
| Fecal incontinence           | 3.7                    | -1.0 – 8.3   | 0.13    | 0.2                    | 0.0 – 0.4   | 0.12    | -0.4                   | -1.1 – 0.2  | 0.24    | 10.1                        | 0.2 – 20.0   | 0.05    |
| Sore skin                    | 4.7                    | -1.3 – 10.7  | 0.12    | -0.2                   | -0.5 – 0.1  | 0.27    | -1.0                   | -1.9 – -0.2 | 0.02    | -1.0                        | -13.8 – 11.8 | 0.88    |
| Stool frequency              | 3.6                    | -1.2 – 8.3   | 0.14    | -0.1                   | -0.3 – 0.1  | 0.35    | -0.6                   | -1.2 – 0.1  | 0.07    | -1.0                        | -11.2 – 9.2  | 0.85    |
| Embarrassment                | 4.8                    | -1.4 – 10.9  | 0.13    | 0.0                    | -0.3 – 0.3  | 0.75    | -0.4                   | -1.3 – 0.5  | 0.36    | -1.7                        | -14.8 – 11.5 | 0.80    |
| Impotence                    | ..                     | ..           | ..      | 1.7                    | 1.0 – 2.3   | <0.001  | -0.9                   | -2.8 – 1.0  | 0.35    | -29.4                       | -61.9 – 3.1  | 0.08    |
| Dyspareunia                  | ..                     | ..           | ..      | -0.1                   | -0.6 – 0.4  | 0.63    | -0.5                   | -2.0 – 1.1  | 0.57    | 4.3                         | -17.2 – 25.9 | 0.67    |
| <b>Function scales/items</b> |                        |              |         |                        |             |         |                        |             |         |                             |              |         |
| Anxiety                      | -6.9                   | -12.8 – -1.0 | 0.02    | 0.4                    | 0.1 – 0.7   | 0.01    | -0.5                   | -1.3 – 0.3  | 0.25    | -6.4                        | -19.2 – 6.3  | 0.32    |
| Weight                       |                        |              |         |                        |             |         |                        |             |         |                             |              |         |
| Body image                   | 0.8                    | -3.6 – 5.2   | 0.73    | 0.1                    | -0.1 – 0.3  | 0.33    | -0.2                   | -0.8 – 0.5  | 0.63    | -4.1                        | -13.4 – 5.2  | 0.39    |
| Sexual interest (men)        | ..                     | ..           | ..      | 0.7                    | 0.3 – 1.1   | 0.001   | 0.1                    | -1.0 – 1.2  | 0.85    | 3.0                         | -15.8 – 21.8 | 0.75    |
| Sexual interest (women)      | ..                     | ..           | ..      | 0.4                    | -0.1 – 0.9  | 0.14    | -0.2                   | -1.9 – 1.5  | 0.78    | 8.7                         | -12.5 – 30.0 | 0.41    |
| <b>Short form-36</b>         |                        |              |         |                        |             |         |                        |             |         |                             |              |         |
| <b>Function scales</b>       |                        |              |         |                        |             |         |                        |             |         |                             |              |         |
| Physical functioning         | -3.7                   | -9.2 – 1.9   | 0.20    | -0.6                   | -0.8 – -0.3 | <0.001  | 0.5                    | -0.3 – 1.3  | 0.20    | -14.1                       | -28.0 – -0.2 | 0.05    |
| Physical role functioning    | 1.9                    | -8.1 – 11.8  | 0.71    | -0.1                   | -0.6 – 0.4  | 0.68    | 0.1                    | -1.3 – 1.5  | 0.92    | -20.4                       | -45.1 – 4.2  | 0.10    |

|                            | Independent variables  |              |         |                        |            |         |                        |            |         |                             |              |         |
|----------------------------|------------------------|--------------|---------|------------------------|------------|---------|------------------------|------------|---------|-----------------------------|--------------|---------|
|                            | Sex                    |              |         | Age                    |            |         | Tumour distance        |            |         | Neoadjuvant treatment       |              |         |
|                            | (female patients)      |              |         | (years)                |            |         | (cm)                   |            |         | (short-course radiotherapy) |              |         |
|                            | Regression coefficient | 95%CI        | p-value | Regression coefficient | 95%CI      | p-value | Regression coefficient | 95%CI      | p-value | Regression coefficient      | 95%CI        | p-value |
| Bodily pain                | -5.3                   | -10.3 – -0.4 | 0.04    | 0.1                    | -0.2 – 0.3 | 0.52    | -0.5                   | -1.2 – 0.2 | 0.17    | -8.0                        | -20.2 – 4.8  | 0.23    |
| General health             | -0.1                   | -6.0 – 5.8   | 0.97    | -0.1                   | -0.4 – 0.2 | 0.47    | -0.4                   | -1.2 – 0.5 | 0.39    | -6.6                        | -21.2 – 8.1  | 0.38    |
| Vitality                   | -5.7                   | -10.1 – -1.3 | 0.01    | 0.1                    | -0.1 – 0.3 | 0.50    | 0.0                    | -0.6 – 0.7 | 0.92    | -1.7                        | -12.8 – 9.4  | 0.76    |
| Social functioning         | 0.5                    | -4.2 – 5.2   | 0.84    | -0.1                   | -0.3 – 0.2 | 0.68    | 0.0                    | -0.6 – 0.7 | 0.90    | -5.6                        | -17.4 – 6.1  | 0.35    |
| Emotional role functioning | -2.7                   | -10.1 – 4.7  | 0.48    | -0.1                   | -0.5 – 0.3 | 0.68    | 0.2                    | -0.8 – 1.3 | 0.66    | -27.5                       | -45.7 – -9.3 | 0.003   |
| Mental health              | -3.7                   | -7.8 – 0.4   | 0.08    | 0.1                    | -0.1 – 0.3 | 0.18    | 0.1                    | -0.4 – 0.7 | 0.63    | -9.7                        | -19.9 – 0.5  | 0.06    |
|                            |                        |              |         |                        |            |         |                        |            |         |                             |              |         |

| C                                                      | Independent variables  |            |         |                        |             |         |                        |            |         |                             |              |         |
|--------------------------------------------------------|------------------------|------------|---------|------------------------|-------------|---------|------------------------|------------|---------|-----------------------------|--------------|---------|
|                                                        | Sex                    |            |         | Age                    |             |         | Tumour distance        |            |         | Neoadjuvant treatment       |              |         |
|                                                        | (female patients)      |            |         | (years)                |             |         | (cm)                   |            |         | (short-course radiotherapy) |              |         |
|                                                        | Regression coefficient | 95%CI      | p-value | Regression coefficient | 95%CI       | p-value | Regression coefficient | 95%CI      | p-value | Regression coefficient      | 95%CI        | p-value |
| <b>Low Anterior Resection Syndrome (LARS) score</b>    |                        |            |         |                        |             |         |                        |            |         |                             |              |         |
| LARS score                                             | 3.8                    | 0.6 – 6.9  | 0.02    | -0.1                   | -0.3 – 0.0  | 0.10    | -0.4                   | -0.9 – 0.0 | 0.07    | -0.9                        | -8.9 – 7.1   | 0.82    |
| <b>Vaizey incontinence score</b>                       |                        |            |         |                        |             |         |                        |            |         |                             |              |         |
| Vaizey incontinence score                              | -0.1                   | -1.4 – 1.1 | 0.82    | 0.0                    | 0.0 – 0.1   | 0.19    | 0.1                    | 0.0 – 0.3  | 0.14    | 1.0                         | -2.1 – 4.2   | 0.52    |
| <b>International Prostate Symptom Score (IPSS)</b>     |                        |            |         |                        |             |         |                        |            |         |                             |              |         |
| IPSS                                                   | ..                     | ..         | ..      | 0.1                    | 0.0 – 0.2   | 0.02    | 0.0                    | -0.2 – 0.2 | 0.84    | 0.1                         | -3.4 – 3.6   | 0.94    |
| <b>International Index of Erectile Function (IIEF)</b> |                        |            |         |                        |             |         |                        |            |         |                             |              |         |
| Erectile function                                      | ..                     | ..         | ..      | -0.4                   | -0.5 – 0.2  | <0.001  | -0.1                   | -0.6 – 0.3 | 0.56    | 0.8                         | -7.4 – 8.9   | 0.86    |
| Orgasmic function                                      | ..                     | ..         | ..      | -0.1                   | -0.2 – -0.1 | <0.001  | -0.1                   | -0.3 – 0.1 | 0.24    | 2.4                         | -1.0 – 5.7   | 0.17    |
| Sexual desire                                          | ..                     | ..         | ..      | -0.1                   | -0.1 – -0.1 | <0.001  | 0.0                    | -0.1 – 0.1 | 0.39    | 1.0                         | -0.9 – 2.8   | 0.30    |
| Intercourse satisfaction                               | ..                     | ..         | ..      | -0.1                   | -0.2 – -0.1 | 0.002   | -0.2                   | -0.4 – 0.0 | 0.12    | -0.4                        | -4.5 – 3.7   | 0.86    |
| Overall satisfaction                                   | ..                     | ..         | ..      | -0.1                   | -0.1 – -0.0 | 0.04    | -0.1                   | -0.2 – 0.0 | 0.26    | -2.1                        | -4.2 – -0.1  | 0.04    |
| Total IIEF score                                       | ..                     | ..         | ..      | -0.8                   | -1.1 – -0.4 | <0.001  | -0.3                   | -1.2 – 0.6 | 0.47    | 1.6                         | -15.1 – 18.3 | 0.85    |
| <b>Female Sexual Function Index (FSFI)</b>             |                        |            |         |                        |             |         |                        |            |         |                             |              |         |
| Desire                                                 | ..                     | ..         | ..      | 0.0                    | 0.0 – 0.0   | 0.38    | -0.1                   | -0.1 – 0.0 | 0.10    | -1.0                        | -2.2 – 0.2   | 0.11    |
| Arousal                                                | ..                     | ..         | ..      | 0.0                    | -0.1 – 0.0  | 0.05    | -0.1                   | -0.2 – 0.1 | 0.25    | -1.5                        | -3.5 – 0.4   | 0.13    |
| Lubrication                                            | ..                     | ..         | ..      | 0.0                    | 0.0 – 0.1   | 0.92    | -0.1                   | -0.2 – 0.0 | 0.14    | -0.3                        | -2.5 – 2.0   | 0.80    |
| Orgasm                                                 | ..                     | ..         | ..      | 0.0                    | -0.1 – 0.0  | 0.43    | -0.1                   | -0.3 – 0.0 | 0.08    | 0.3                         | -2.1 – 2.6   | 0.83    |
| Satisfaction                                           | ..                     | ..         | ..      | 0.0                    | 0.0 – 0.0   | 0.81    | 0.1                    | -0.0 – 0.2 | 0.18    | -0.6                        | -2.3 – 1.1   | 0.50    |
| Pain                                                   | ..                     | ..         | ..      | 0.0                    | -0.1 – 0.0  | 0.26    | -0.0                   | -0.2 – 0.1 | 0.73    | 0.2                         | -2.0 – 2.5   | 0.83    |
| Full scale score                                       | ..                     | ..         | ..      | 0.0                    | -0.2 – 0.1  | 0.67    | 0.1                    | -0.5 – 0.6 | 0.73    | -1.8                        | -10.5 – 7.0  | 0.69    |

**eTable 4.** Quality of Life and Functional Outcome of All Patients Included in the Dutch Watch-and-Wait Registry at 3, 12, and 24 Months Following Inclusion <sup>a</sup>

<sup>a</sup> measured with (A) the EORTC-QLQ-C30 and SF-36, (B) the EORTC-QLQ-CR29 and EORTC-QLQ-CR38, (C) the LARS score, Vaizey score, IPSS score, IIEF, and FSFI. \* = subscales or scores were not completed by patients with a colostomy.

| A                          | 3 months    | 12 months   | 24 months   | 12 versus 3 months |         |                | 24 versus 3 months |         |                | 24 versus 12 months |         |                |
|----------------------------|-------------|-------------|-------------|--------------------|---------|----------------|--------------------|---------|----------------|---------------------|---------|----------------|
|                            | Mean (SD)   | Mean (SD)   | Mean (SD)   | Mean diff.         | p-value | Clinical sign. | Mean diff.         | p-value | Clinical sign. | Mean diff.          | p-value | Clinical sign. |
| <b>EORTC-QLQ-C30</b>       |             |             |             |                    |         |                |                    |         |                |                     |         |                |
| <i>Function scales</i>     |             |             |             |                    |         |                |                    |         |                |                     |         |                |
| Global health status       | 81.1 (16.0) | 82.9 (16.5) | 79.1 (21.5) | 1.9                | 0.05    | Trivial        | -2.0               | 0.11    | Trivial        | -3.8                | 0.001   | Trivial        |
| Physical functioning       | 89.4 (15.4) | 89.2 (15.6) | 90.1 (14.4) | -0.3               | 0.69    | Trivial        | 0.6                | 0.42    | Trivial        | 0.9                 | 0.19    | Trivial        |
| Emotional functioning      | 85.0 (17.1) | 87.7 (15.7) | 87.3 (15.5) | 2.8                | 0.004   | Trivial        | 2.3                | 0.02    | Trivial        | -0.4                | 0.63    | Trivial        |
| Cognitive functioning      | 87.9 (16.6) | 88.4 (15.3) | 87.8 (17.0) | 0.5                | 0.58    | Trivial        | -0.1               | 0.95    | Trivial        | -0.5                | 0.58    | Trivial        |
| Social functioning         | 86.2 (21.7) | 90.6 (16.0) | 91.1 (14.7) | 4.4                | 0.003   | Small          | 4.9                | <0.001  | Small          | 0.5                 | 0.67    | Trivial        |
| <i>Symptom scales</i>      |             |             |             |                    |         |                |                    |         |                |                     |         |                |
| Fatigue                    | 19.0 (21.4) | 16.6 (19.3) | 16.3 (21.0) | -2.4               | 0.09    | Trivial        | -2.7               | 0.08    | Trivial        | -0.2                | 0.85    | Trivial        |
| Nausea                     | 1.9 (7.1)   | 2.4 (9.8)   | 3.0 (9.0)   | 0.5                | 0.47    | Trivial        | 1.1                | 0.09    | Trivial        | 0.6                 | 0.37    | Trivial        |
| Pain                       | 9.5 (21.4)  | 9.0 (20.1)  | 9.0 (18.9)  | -0.5               | 0.74    | Trivial        | -0.5               | 0.73    | Trivial        | 0.0                 | 1.00    | Trivial        |
| Insomnia                   | 16.7 (23.8) | 16.3 (23.8) | 15.2 (23.4) | -0.4               | 0.79    | Trivial        | -1.4               | 0.35    | Trivial        | -1.1                | 0.51    | Trivial        |
| Appetite loss              | 2.8 (10.4)  | 4.1 (15.2)  | 4.3 (13.5)  | 1.3                | 0.21    | Trivial        | 1.6                | 0.10    | Trivial        | 0.2                 | 0.79    | Trivial        |
| Constipation               | 5.9 (13.9)  | 6.4 (14.8)  | 6.6 (15.5)  | 0.5                | 0.67    | Trivial        | 0.7                | 0.51    | Trivial        | -0.2                | 0.84    | Trivial        |
| Diarrhea                   | 9.7 (18.1)  | 9.7 (18.5)  | 10.7 (20.1) | 0.0                | 1.00    | Trivial        | 1.0                | 0.47    | Trivial        | 1.0                 | 0.50    | Trivial        |
| Financial difficulties     | 5.6 (14.6)  | 4.3 (13.8)  | 5.9 (15.6)  | -1.3               | 0.08    | Trivial        | 0.2                | 0.78    | Trivial        | 1.6                 | 0.07    | Trivial        |
| <b>Short form-36</b>       |             |             |             |                    |         |                |                    |         |                |                     |         |                |
| <i>Function scales</i>     |             |             |             |                    |         |                |                    |         |                |                     |         |                |
| Physical functioning       | 83.8 (20.1) | 83.2 (21.6) | 82.3 (21.1) | -0.6               | 0.53    | ..             | -1.5               | 0.15    | ..             | -0.9                | 0.28    | ..             |
| Physical role functioning  | 71.1 (39.5) | 74.6 (38.5) | 76.8 (35.9) | 3.4                | 0.19    | ..             | 5.7                | 0.01    | ..             | 2.2                 | 0.38    | ..             |
| Bodily pain                | 87.3 (19.5) | 87.7 (17.7) | 86.4 (18.4) | 0.5                | 0.70    | ..             | -0.8               | 0.51    | ..             | -1.3                | 0.24    | ..             |
| General health             | 69.1 (18.7) | 71.6 (18.3) | 71.5 (21.5) | 2.5                | 0.02    | ..             | 2.4                | 0.08    | ..             | -0.1                | 0.95    | ..             |
| Vitality                   | 66.6 (15.5) | 67.4 (14.0) | 68.0 (15.9) | 0.8                | 0.31    | ..             | 1.4                | 0.14    | ..             | 0.6                 | 0.54    | ..             |
| Social functioning         | 86.0 (20.5) | 86.7 (18.3) | 86.5 (18.4) | 0.7                | 0.57    | ..             | 0.5                | 0.70    | ..             | -0.2                | 0.88    | ..             |
| Emotional role functioning | 80.7 (35.1) | 83.6 (32.4) | 87.1 (28.3) | 2.9                | 0.24    | ..             | 6.4                | 0.01    | ..             | 3.5                 | 0.06    | ..             |
| Mental health              | 75.5 (13.9) | 75.9 (13.3) | 73.8 (15.4) | 0.5                | 0.52    | ..             | -1.6               | 0.08    | ..             | -2.1                | 0.008   | ..             |

| B                            | 3 months              | 12 months   | 24 months   | 12 versus 3 months |         | 24 versus 3 months |         | 24 versus 12 months |         |
|------------------------------|-----------------------|-------------|-------------|--------------------|---------|--------------------|---------|---------------------|---------|
|                              | Mean (SD)             | Mean (SD)   | Mean (SD)   | Mean diff.         | p-value | Mean diff.         | p-value | Mean diff.          | p-value |
|                              | <b>EORTC-QLQ-CR29</b> |             |             |                    |         |                    |         |                     |         |
| <b>Symptom scales/items</b>  |                       |             |             |                    |         |                    |         |                     |         |
| Urinary frequency            | 22.8 (20.2)           | 24.4 (19.5) | 26.8 (19.0) | 1.6                | 0.32    | 4.0                | 0.02    | 2.4                 | 0.11    |
| Urinary incontinence         | 5.1 (12.6)            | 8.6 (15.2)  | 10.6 (17.7) | 3.5                | 0.001   | 5.5                | <0.001  | 2.0                 | 0.10    |
| Dysuria                      | 2.3 (8.6)             | 1.4 (5.9)   | 1.6 (6.3)   | -0.9               | 0.19    | -0.8               | 0.29    | 0.2                 | 0.77    |
| Abdominal pain               | 7.4 (15.6)            | 7.2 (16.9)  | 7.1 (14.1)  | -0.1               | 0.93    | -0.3               | 0.82    | -0.2                | 0.88    |
| Buttock pain                 | 13.9 (23.8)           | 10.1 (18.6) | 11.6 (18.3) | -3.8               | 0.03    | -2.3               | 0.25    | 1.5                 | 0.35    |
| Bloating                     | 12.6 (20.1)           | 10.5 (18.4) | 12.9 (18.5) | -2.1               | 0.19    | 0.3                | 0.83    | 2.4                 | 0.07    |
| Blood and mucus in stool     | 5.9 (12.8)            | 4.5 (9.9)   | 4.3 (8.1)   | -1.4               | 0.16    | -1.6               | 0.10    | -0.2                | 0.77    |
| Dry mouth                    | 19.6 (30.8)           | 8.5 (16.3)  | 8.7 (16.1)  | -11.1              | <0.001  | -10.8              | <0.001  | -0.2                | 0.85    |
| Hair loss                    | 10.0 (26.6)           | 2.0 (7.2)   | 1.8 (6.8)   | -8.0               | <0.001  | -8.1               | <0.001  | -0.2                | 0.79    |
| Taste                        | 6.6 (19.5)            | 4.0 (12.2)  | 2.0 (7.1)   | -2.6               | 0.07    | -4.5               | 0.002   | -1.9                | 0.03    |
| Flatulence*                  | 25.9 (26.2)           | 24.6 (23.5) | 26.4 (23.0) | -1.6               | 0.44    | 1.2                | 0.55    | 1.6                 | 0.37    |
| Fecal incontinence*          | 9.2 (16.1)            | 9.5 (16.7)  | 8.0 (13.1)  | 0.4                | 0.77    | -1.7               | 0.23    | -2.0                | 0.13    |
| Sore skin*                   | 12.7 (20.2)           | 11.3 (20.8) | 9.9 (16.8)  | -2.0               | 0.26    | -3.2               | 0.10    | -1.6                | 0.34    |
| Stool frequency*             | 15.2 (15.4)           | 14.1 (14.9) | 12.3 (13.6) | -1.0               | 0.42    | -2.6               | 0.04    | -1.8                | 0.16    |
| Embarrassment*               | 9.3 (18.1)            | 11.4 (20.2) | 12.9 (17.4) | 2.2                | 0.14    | 3.7                | 0.04    | 1.3                 | 0.46    |
| Impotence                    | 36.5 (38.0)           | 36.6 (32.3) | 44.4 (32.5) | 0.1                | 0.98    | 7.9                | 0.02    | 7.8                 | 0.009   |
| Dyspareunia                  | 27.5 (21.2)           | 20.8 (21.1) | 23.8 (20.4) | -6.7               | 0.05    | 3.7                | 0.24    | 3.0                 | 0.21    |
| <b>Function scales/items</b> |                       |             |             |                    |         |                    |         |                     |         |
| Anxiety                      | 72.4 (22.4)           | 76.1 (22.7) | 80.5 (18.0) | 3.8                | 0.02    | 8.1                | <0.001  | 4.3                 | 0.009   |
| Weight                       | 84.9 (21.6)           | 84.3 (23.4) | 88.5 (17.9) | -0.6               | 0.69    | 3.6                | 0.04    | 4.2                 | 0.01    |
| Body image                   | 85.1 (25.3)           | 90.3 (16.5) | 89.7 (15.6) | 5.6                | 0.006   | 5.0                | 0.02    | -0.5                | 0.66    |
| Sexual interest (men)        | 63.8 (27.0)           | 64.0 (28.5) | 63.6 (20.3) | 0.3                | 0.92    | -0.2               | 0.93    | -0.5                | 0.85    |
| Sexual interest (women)      | 81.4 (18.4)           | 81.5 (19.2) | 80.8 (17.6) | 0.2                | 0.94    | -0.6               | 0.81    | -0.8                | 0.71    |
| <b>EORTC-QLQ-CR38</b>        |                       |             |             |                    |         |                    |         |                     |         |
| <b>Symptom scales/items</b>  |                       |             |             |                    |         |                    |         |                     |         |
| Micturition problems         | 16.7 (16.1)           | 14.7 (13.2) | 14.6 (12.9) | -2.0               | 0.25    | -2.1               | 0.18    | -0.1                | 0.95    |
| Chemotherapy side effects    | 9.2 (11.6)            | 8.1 (9.4)   | 10.2 (12.0) | -1.1               | 0.41    | 1.0                | 0.50    | 2.1                 | 0.11    |
| Symptoms of the GI tract     | 14.5 (11.2)           | 12.4 (10.6) | 12.8 (9.8)  | -2.1               | 0.08    | -1.7               | 0.18    | 0.4                 | 0.70    |
| Male sexual problems         | 31.4 (28.0)           | 36.8 (29.5) | 39.3 (24.9) | 5.4                | 0.10    | 7.9                | 0.05    | 2.5                 | 0.52    |
| Female sexual problems       | 41.3 (27.6)           | 21.6 (18.0) | 40.9 (15.9) | -19.7              | <0.001  | -0.5               | 0.92    | 19.3                | <0.001  |
| Defecation problems*         | 10.1 (8.1)            | 8.6 (7.2)   | 8.3 (7.0)   | -1.6               | 0.06    | -1.8               | 0.02    | -0.3                | 0.72    |



|                        | 3 months    | 12 months   | 24 months   | 12 versus 3 months |         | 24 versus 3 months |         | 24 versus 12 months |         |
|------------------------|-------------|-------------|-------------|--------------------|---------|--------------------|---------|---------------------|---------|
|                        | Mean (SD)   | Mean (SD)   | Mean (SD)   | Mean diff.         | p-value | Mean diff.         | p-value | Mean diff.          | p-value |
| Weight loss            | 6.0 (17.0)  | 4.2 (10.0)  | 6.5 (11.9)  | -1.8               | 0.39    | 0.5                | 0.82    | 2.2                 | 0.14    |
| <b>Function scales</b> |             |             |             |                    |         |                    |         |                     |         |
| Body image             | 91.0 (16.4) | 89.3 (17.2) | 92.0 (14.0) | -1.7               | 0.25    | 1.0                | 0.50    | 2.7                 | 0.09    |
| Sexual functioning     | 70.8 (21.6) | 70.7 (20.7) | 70.9 (15.2) | -0.1               | 0.96    | 0.1                | 0.96    | 0.2                 | 0.91    |
| Sexual enjoyment       | 48.1 (21.9) | 50.2 (25.0) | 41.9 (19.9) | 2.0                | 0.43    | -6.2               | 0.02    | -8.3                | 0.003   |
| Future perspective     | 67.5 (18.0) | 72.8 (20.9) | 82.0 (19.1) | 5.3                | 0.02    | 14.5               | <0.001  | 9.2                 | <0.001  |

| <b>C</b>                                               |             |             |             |                    |         |                    |         |                     |         |
|--------------------------------------------------------|-------------|-------------|-------------|--------------------|---------|--------------------|---------|---------------------|---------|
|                                                        | 3 months    | 12 months   | 24 months   | 12 versus 3 months |         | 24 versus 3 months |         | 24 versus 12 months |         |
|                                                        |             |             |             | Mean diff.         | p-value | Mean diff.         | p-value | Mean diff.          | p-value |
| <b>Low Anterior Resection Syndrome (LARS) score*</b>   |             |             |             |                    |         |                    |         |                     |         |
| <b>Mean</b>                                            |             |             |             |                    |         |                    |         |                     |         |
| Mean score (SD)                                        | 21.4 (11.3) | 21.5 (11.3) | 21.3 (11.4) | 0.1                | 0.83    | 0.1                | 0.99    | -0.1                | 0.92    |
| <b>Percentage</b>                                      |             |             |             |                    |         |                    |         |                     |         |
| % major LARS                                           | 26.7        | 25.9        | 27.7        |                    | 1.000   |                    | 0.81    |                     | 0.60    |
| <b>Vaizey incontinence score*</b>                      |             |             |             |                    |         |                    |         |                     |         |
| <b>Mean</b>                                            |             |             |             |                    |         |                    |         |                     |         |
| Mean score (SD)                                        | 7.3 (4.3)   | 7.2 (4.0)   | 8.1 (4.3)   | 0.1                | 0.84    | 1.1                | <0.001  | 1.0                 | <0.001  |
| <b>Percentage</b>                                      |             |             |             |                    |         |                    |         |                     |         |
| % major incontinence                                   | 12.8        | 13.5        | 22.7        |                    | 0.88    |                    | 0.002   |                     | 0.004   |
| <b>International Prostate Symptom Score (IPSS)</b>     |             |             |             |                    |         |                    |         |                     |         |
| <b>Mean</b>                                            |             |             |             |                    |         |                    |         |                     |         |
| Mean score (SD)                                        | 5.7 (5.8)   | 6.7 (6.8)   | 5.7 (4.3)   | 1.0                | 0.05    | 0.1                | 0.86    | -1.0                | 0.03    |
| <b>Percentage</b>                                      |             |             |             |                    |         |                    |         |                     |         |
| % severe dysfunction                                   | 4.3         | 8.6         | 0.5         |                    | 0.13    |                    | 0.04    |                     | <0.001  |
| <b>International Index of Erectile Function (IIEF)</b> |             |             |             |                    |         |                    |         |                     |         |
| <b>Mean score (SD)</b>                                 |             |             |             |                    |         |                    |         |                     |         |
| Erectile function                                      | 14.6 (11.4) | 14.4 (9.8)  | 14.1 (9.0)  | -0.2               | 0.80    | -0.5               | 0.55    | -0.3                | 0.64    |
| Orgasmic function                                      | 5.3 (4.4)   | 5.6 (4.4)   | 5.4 (3.8)   | 0.3                | 0.42    | 0.0                | 0.88    | -0.2                | 0.45    |
| Sexual desire                                          | 5.5 (2.4)   | 5.5 (2.6)   | 5.5 (2.0)   | 0.0                | 0.98    | 0.0                | 0.84    | 0.0                 | 0.82    |

|                                            | 3 months    | 12 months   | 24 months   | 12 versus 3 months |         | 24 versus 3 months |         | 24 versus 12 months |         |
|--------------------------------------------|-------------|-------------|-------------|--------------------|---------|--------------------|---------|---------------------|---------|
|                                            |             |             |             | Mean diff.         | p-value | Mean diff.         | p-value | Mean diff.          | p-value |
| Intercourse satisfaction                   | 4.6 (5.4)   | 4.7 (4.8)   | 5.0 (4.5)   | 0.1                | 0.83    | 0.4                | 0.36    | 0.3                 | 0.37    |
| Overall satisfaction                       | 6.8 (2.7)   | 6.7 (2.3)   | 6.6 (2.3)   | -0.1               | 0.67    | -0.2               | 0.40    | -0.1                | 0.57    |
| Total IIEF score                           | 38.7 (20.7) | 36.8 (19.5) | 37.4 (18.4) | -1.9               | 0.12    | -1.4               | 0.34    | 0.6                 | 0.64    |
| <b>Percentage</b>                          |             |             |             |                    |         |                    |         |                     |         |
| % severe erectile dysfunction              | 44.9        | 39.6        | 33.2        |                    | 0.17    |                    | 0.009   |                     | 0.12    |
| <b>Female Sexual Function Index (FSFI)</b> |             |             |             |                    |         |                    |         |                     |         |
| <b>Mean score (SD)</b>                     |             |             |             |                    |         |                    |         |                     |         |
| Desire                                     | 2.4 (1.1)   | 2.2 (1.0)   | 2.3 (1.0)   | -0.1               | 0.21    | -0.1               | 0.37    | 0.1                 | 0.62    |
| Arousal                                    | 2.0 (1.8)   | 2.0 (1.9)   | 2.0 (1.7)   | 0.0                | 0.96    | 0.0                | 0.98    | 0.0                 | 0.98    |
| Lubrication                                | 2.1 (2.1)   | 2.4 (2.2)   | 2.3 (1.9)   | 0.3                | 0.13    | 0.2                | 0.47    | -0.1                | 0.55    |
| Orgasm                                     | 2.3 (2.3)   | 2.1 (2.2)   | 2.3 (2.0)   | -0.2               | 0.36    | 0.0                | 0.94    | 0.2                 | 0.43    |
| Satisfaction                               | 3.9 (1.5)   | 4.2 (1.3)   | 3.4 (1.4)   | 0.3                | 0.11    | -0.5               | 0.004   | -0.8                | <0.001  |
| Pain                                       | 2.1 (2.2)   | 2.0 (2.1)   | 1.7 (1.9)   | -0.1               | 0.79    | -0.4               | 0.09    | -0.3                | 0.13    |
| Full scale score                           | 18.2 (7.8)  | 17.1 (7.8)  | 15.4 (7.6)  | -1.1               | 0.16    | -2.8               | 0.001   | -1.7                | 0.02    |
