# Supplementary material
Source: PubMed Central journal article supplement (PMC10061319)
Supplement: jamasurg-e230146-s002.pdf [file jamasurg-e230146-s002.pdf]

\*First name, last name, and suffix (if applicable) are required and will appear in PubMed.

| <b>*Group Name(s): Dutch Watch-and-Wait Consortium</b> |                   |                              |                  |                                                                                                                                  |                                                         |                                                         |                                                                                            |
|--------------------------------------------------------|-------------------|------------------------------|------------------|----------------------------------------------------------------------------------------------------------------------------------|---------------------------------------------------------|---------------------------------------------------------|--------------------------------------------------------------------------------------------|
| <b>*First Name and Middle Initial(s)</b>               | <b>*Last Name</b> | <b>*Suffix (eg, Jr, III)</b> | Academic Degrees | Institution                                                                                                                      | Location (city, state/province, country)                | Role or Contribution, eg, chair, principal investigator | Group (if more than 1 Group listed in the byline and/or Subgroup (eg, Steering Committee)) |
| Antonius J.N.M.                                        | Bastiaansen       |                              |                  | Noordwest Ziekenhuisgroep                                                                                                        | Alkmaar, the Netherlands                                | Data collection                                         | Dutch Watch-and-Wait consortium                                                            |
| Regina G.H.                                            | Beets-Tan         |                              |                  | Netherlands Cancer Institute - Antoni van Leeuwenhoek; GROW School for Oncology and Developmental Biology, Maastricht University | Amsterdam, the Netherlands; Maastricht, the Netherlands | Data collection                                         | Dutch Watch-and-Wait consortium                                                            |
| Monique P.M.                                           | Borremans         |                              |                  | Elisabeth Tweesteden Hospital                                                                                                    | Tilburg, the Netherlands                                | Data collection                                         | Dutch Watch-and-Wait consortium                                                            |
| Andre J.A.                                             | Bremers           |                              |                  | Radboud University Medical Center                                                                                                | Nijmegen, the Netherlands                               | Data collection                                         | Dutch Watch-and-Wait consortium                                                            |
| Mich S.                                                | Dunker            |                              |                  | Noordwest Ziekenhuisgroep                                                                                                        | Alkmaar, the Netherlands                                | Data collection                                         | Dutch Watch-and-Wait consortium                                                            |
| Sebastiaan                                             | Festen            |                              |                  | Onze Lieve Vrouwe Gasthuis                                                                                                       | Amsterdam, the Netherlands                              | Data collection                                         | Dutch Watch-and-Wait consortium                                                            |
| Christiaan                                             | Hoff              |                              |                  | Medical Center Leeuwarden                                                                                                        | Leeuwarden, the Netherlands                             | Principal investigator; Data Collection                 | Dutch Watch-and-Wait consortium                                                            |
| Hester E.                                              | Haak              |                              |                  | Netherlands Cancer Institute - Antoni van Leeuwenhoek; GROW School for Oncology and Developmental Biology, Maastricht University | Amsterdam, the Netherlands; Maastricht, the Netherlands | Data collection                                         | Dutch Watch-and-Wait consortium                                                            |
| Inge L.                                                | Huibregtse        |                              |                  | Netherlands Cancer Institute - Antoni van Leeuwenhoek                                                                            | Amsterdam, the Netherlands                              | Data collection                                         | Dutch Watch-and-Wait consortium                                                            |
| Martijn P.W.                                           | Intven            |                              |                  | University Medical Center Utrecht                                                                                                | Utrecht, the Netherlands                                | Data collection                                         | Dutch Watch-and-Wait consortium                                                            |

## Supplemental Online Content: Nonauthor Collaborators

\*First name, last name, and suffix (if applicable) are required and will appear in PubMed.

| *First Name and Middle Initial(s) | *Last Name  | *Suffix (eg, Jr, III) | Academic Degrees | Institution                                                                                                          | Location (city, state/province, country)            | Role or Contribution, eg, chair, principal investigator | Group (if more than 1 Group listed in the byline) and/or Subgroup (eg, Steering Committee) |
|-----------------------------------|-------------|-----------------------|------------------|----------------------------------------------------------------------------------------------------------------------|-----------------------------------------------------|---------------------------------------------------------|--------------------------------------------------------------------------------------------|
| Niels                             | Komen       |                       |                  | Antwerp University Hospital; Antwerp Surgical Training, Anatomy, and Research Center (ASTRAC), University of Antwerp | Edegem, Belgium; Antwerp, Belgium                   | Principal investigator; Data Collection                 | Dutch Watch-and-Wait consortium                                                            |
| Sietze A.                         | Koopal      |                       |                  | Medical Center Leeuwarden                                                                                            | Leeuwarden, the Netherlands                         | Data collection                                         | Dutch Watch-and-Wait consortium                                                            |
| Doenja M.J.                       | Lambregts   |                       |                  | Netherlands Cancer Institute - Antoni van Leeuwenhoek                                                                | Amsterdam, the Netherlands                          | Data collection                                         | Dutch Watch-and-Wait consortium                                                            |
| Monique E.                        | van Leerdam |                       |                  | Netherlands Cancer Institute - Antoni van Leeuwenhoek; Leiden University Medical Center                              | Amsterdam, the Netherlands; Leiden, the Netherlands | Data collection                                         | Dutch Watch-and-Wait consortium                                                            |
| Monique                           | Maas        |                       |                  | Netherlands Cancer Institute - Antoni van Leeuwenhoek                                                                | Amsterdam, the Netherlands                          | Data collection                                         | Dutch Watch-and-Wait consortium                                                            |
| Corrie A.M.                       | Marijnen    |                       |                  | Netherlands Cancer Institute - Antoni van Leeuwenhoek; Leiden University Medical Center                              | Amsterdam, the Netherlands; Leiden, the Netherlands | Data collection                                         | Dutch Watch-and-Wait consortium                                                            |
| Jarno                             | Melenhorst  |                       |                  | Maastricht University Medical Center                                                                                 | Maastricht, the Netherlands                         | Data collection                                         | Dutch Watch-and-Wait consortium                                                            |
| Koen C.M.J.                       | Peeters     |                       |                  | Leiden University Medical Center                                                                                     | Leiden, the Netherlands                             | Principal investigator; Data Collection                 | Dutch Watch-and-Wait consortium                                                            |
| Apollo                            | Pronk       |                       |                  | Diakonessenhuis                                                                                                      | Utrecht, the Netherlands                            | Principal investigator; Data Collection                 | Dutch Watch-and-Wait consortium                                                            |
| Anandi H.W.                       | Schiphorst  |                       |                  | Diakonessenhuis                                                                                                      | Utrecht, the Netherlands                            | Data collection                                         | Dutch Watch-and-Wait consortium                                                            |
| Ivonne J.H.                       | Schoenaker  |                       |                  | Isala                                                                                                                | Zwolle, the Netherlands                             | Data collection                                         | Dutch Watch-and-Wait consortium                                                            |
| Wilhelmina H.                     | Schreurs    |                       |                  | Noordwest Ziekenhuisgroep                                                                                            | Alkmaar, the Netherlands                            | Data collection                                         | Dutch Watch-and-Wait consortium                                                            |

## Supplemental Online Content: Nonauthor Collaborators

\*First name, last name, and suffix (if applicable) are required and will appear in PubMed.

| *First Name and Middle Initial(s) | *Last Name                  | *Suffix (eg, Jr, III) | Academic Degrees | Institution                                           | Location (city, state/province, country) | Role or Contribution, eg, chair, principal investigator | Group (if more than 1 Group listed in the byline) and/or Subgroup (eg, Steering Committee) |
|-----------------------------------|-----------------------------|-----------------------|------------------|-------------------------------------------------------|------------------------------------------|---------------------------------------------------------|--------------------------------------------------------------------------------------------|
| Dirk J.A.                         | Sonneveld                   |                       |                  | Dijklander Hospital                                   | Hoorn, the Netherlands                   | Principal investigator; Data Collection                 | Dutch Watch-and-Wait consortium                                                            |
| Aalbert K.                        | Talsma                      |                       |                  | Deventer Hospital                                     | Deventer, the Netherlands                | Principal investigator; Data Collection                 | Dutch Watch-and-Wait consortium                                                            |
| Baukelien                         | van Triest                  |                       |                  | Netherlands Cancer Institute - Antoni van Leeuwenhoek | Amsterdam, the Netherlands               | Data collection                                         | Dutch Watch-and-Wait consortium                                                            |
| Jurriaan B.                       | Tuynman                     |                       |                  | Amsterdam University Medical Center                   | Amsterdam, the Netherlands               | Principal investigator; Data Collection                 | Dutch Watch-and-Wait consortium                                                            |
| Maarten                           | Vermaas                     |                       |                  | Ijsselland Hospital                                   | Capelle aan de IJssel, the Netherlands   | Principal investigator; Data Collection                 | Dutch Watch-and-Wait consortium                                                            |
| Wouter H.                         | de Vos tot Nederveen Cappel |                       |                  | Isala                                                 | Zwolle, the Netherlands                  | Data collection                                         | Dutch Watch-and-Wait consortium                                                            |
| Darczka K.                        | Wasowicz                    |                       |                  | Elisabeth Tweesteden Hospital                         | Tilburg, the Netherlands                 | Data collection                                         | Dutch Watch-and-Wait consortium                                                            |
| Henderik L.                       | van Westreenen              |                       |                  | Isala                                                 | Zwolle, the Netherlands                  | Principal investigator; Data Collection                 | Dutch Watch-and-Wait consortium                                                            |
| Johannes H.W.                     | de Wilt                     |                       |                  | Radboud University Medical Center                     | Nijmegen, the Netherlands                | Principal investigator; Data Collection                 | Dutch Watch-and-Wait consortium                                                            |
| David D.E.                        | Zimmerman                   |                       |                  | Elisabeth Tweesteden Hospital                         | Tilburg, the Netherlands                 | Principal investigator; Data Collection                 | Dutch Watch-and-Wait consortium                                                            |
