# Supplementary material
Source: PubMed Central journal article supplement (PMC10061319)
Supplement: jamasurg-e230146-s003.pdf [file jamasurg-e230146-s003.pdf]

## Data Sharing Statement

Custers. Long-term Quality of Life and Functional Outcome of Patients With Rectal Cancer Following a Watch-and-Wait Approach. *JAMA Surg*. Published March 29, 2023.

doi:10.1001/jamasurg.2023.0146

### Data

**Data available:** Yes

**Data types:** Deidentified participant data

**How to access data:** Data can be obtained by contacting professor Geerard Beets, principal investigator, [g.beets@nki.nl](mailto:g.beets@nki.nl)

**When available:** With publication

### Supporting Documents

**Document types:** None

### Additional Information

**Who can access the data:** Investigators whose proposed use of the data has been approved by an independent review committee identified for this purpose

**Types of analyses:** To achieve aims in the approved proposal

**Mechanisms of data availability:** Proposals should be directed to professor Geerard Beets, principal investigator, [g.beets@nki.nl](mailto:g.beets@nki.nl); to gain access, data requestors will need to sign a data access agreement

**Any additional restrictions:** none
